# Supplementary material for: The Prevalence of Educational Neuromyths among Hungarian Pre-Service Teachers
Source: MDPI journal article supplement (doi:10.3390/jintelligence11020031), 2023-02-03
Supplement: s1 [file s1]

# The Prevalence of Educational Neuromyths among Hungarian Pre-service Teachers

## Supplementary materials

**Table S1:** Results of ordinal logistic regression representing odds ratios (OR) with 95% confidence interval

| Factors                                       |                                            | Rate of NM <sup>#</sup> incorrect answers |
|-----------------------------------------------|--------------------------------------------|-------------------------------------------|
| Gender                                        |                                            | <b>0.57 (0.35-0.91)</b>                   |
| Age                                           |                                            | 1.01 (1.00-1.03)                          |
| Previous education                            | Previous degree                            | 0.93 (0.62-1.39)                          |
|                                               | Academic year                              | 1.04 (0.91-1.20)                          |
|                                               | Number of completed psychology courses     | 1.06 (0.89-1.27)                          |
|                                               | Current specialization                     | 0.95 (0.86-1.05)                          |
|                                               | Previous courses related to neuroeducation | 0.99 (0.74-1.31)                          |
| Interest in neuroscience of learning/behavior |                                            | 0.96 (0.82-1.12)                          |
| GKAB* error score                             |                                            | 1.01.(0.99-1.02)                          |
| Frequency of using information sources        | Facebook                                   | <b>1.33 (1.16-1.53)</b>                   |
|                                               | YouTube                                    | 0.96 (0.84-1.11)                          |
|                                               | Magazine                                   | 0.98 (0.84-1.15)                          |
|                                               | Journal                                    | 1.01 (0.86-1.19)                          |
|                                               | Conference                                 | 0.99 (0.79-1.24)                          |
|                                               | Training                                   | 1.02 (0.83-1.26)                          |
|                                               | Science journal                            | 1.13 (0.93-1.36)                          |

Note: Significant ORs are marked with **bold letters** ( $p < 0.001$ ); \*GKAB=General Knowledge About the Brain; <sup>#</sup>NM=Neuromyth **0.57 (0.35-0.91)**
